# Supplementary material for: The Candidate Tumor Suppressor Gene SLC8A2 Inhibits Invasion, Angiogenesis and Growth of Glioblastoma
Source: PubMed Central journal article supplement — Mol Cells. 2017 Oct 17;40(10):761–72. doi: 10.14348/molcells.2017.0104 (PMC5682253; doi:10.14348/molcells.2017.0104), 2017-10-17
Supplement: molce-40-10-761-supple.pdf [file molce-40-10-761-supple.pdf]

**Supplementary Table 1:** The 24 pathways with most significant changes associated with these differentially expressed genes (KEGG pathway enrichment analysis). Pathway database: KEGG, Enrichment test *P* value <0.01, FDR *P* value <0.01. Total: the total number of genes for the pathway. Hits: the number of genes.

| Name                                        | Hits | Total | Percent | Enrichment test p value |
|---------------------------------------------|------|-------|---------|-------------------------|
| Adherens junction                           | 18   | 75    | 24.0%   | 0.0                     |
| Amino sugar and nucleotide sugar metabolism | 12   | 44    | 27.27%  | 0.0                     |
| Apoptosis                                   | 17   | 88    | 19.32%  | 0.0                     |
| Cell cycle                                  | 24   | 128   | 18.75%  | 0.0                     |
| Chemokine signaling pathway                 | 27   | 190   | 14.21%  | 0.0                     |
| Focal adhesion                              | 41   | 201   | 20.4%   | 0.0                     |
| Jak-STAT signaling pathway                  | 21   | 155   | 13.55%  | 0.0                     |
| MAPK signaling pathway                      | 45   | 271   | 16.61%  | 0.0                     |
| Metabolic pathways                          | 151  | 1118  | 13.51%  | 0.0                     |
| Nucleotide excision repair                  | 11   | 44    | 25.0%   | 0.0                     |
| p53 signaling pathway                       | 18   | 69    | 26.09%  | 0.0                     |
| Regulation of actin cytoskeleton            | 33   | 216   | 15.28%  | 0.0                     |
| TGF-beta signaling pathway                  | 16   | 85    | 18.82%  | 0.0                     |
| Tight junction                              | 22   | 134   | 16.42%  | 0.0                     |
| Wnt signaling pathway                       | 31   | 151   | 20.53%  | 0.0                     |
| Base excision repair                        | 9    | 34    | 26.47%  | 1.0E-4                  |
| mTOR signaling pathway                      | 11   | 52    | 21.15%  | 1.0E-4                  |
| Cell adhesion molecules (CAMs)              | 18   | 134   | 13.43%  | 2.0E-4                  |
| Toll-like receptor signaling pathway        | 15   | 102   | 14.71%  | 2.0E-4                  |
| ErbB signaling pathway                      | 13   | 87    | 14.94%  | 5.0E-4                  |
| VEGF signaling pathway                      | 11   | 76    | 14.47%  | 0.0017                  |
| Calcium signaling pathway                   | 18   | 178   | 10.11%  | 0.0032                  |
| NOD-like receptor signaling pathway         | 9    | 62    | 14.52%  | 0.0043                  |
| PPAR signaling pathway                      | 9    | 69    | 13.04%  | 0.0080                  |

**Supplementary Table 2:** The first 7 GO terms with most significant changes associated with these differentially expressed genes (GO term enrichment analysis). Enrichment test *P* value <0.01, FDR *P* value <0.01. Total: the total number of GoTerm entries. Hits: the number of changing genes.

| <b>GO ID</b> | <b>Name</b>                             | <b>Hits</b> | <b>Total</b> | <b>Enrichment test p value</b> |
|--------------|-----------------------------------------|-------------|--------------|--------------------------------|
| GO:0007154   | cell communication                      | 665         | 4439         | 0.0                            |
| GO:0008219   | cell death                              | 282         | 1659         | 0.0                            |
| GO:0008283   | cell proliferation                      | 248         | 1481         | 0.0                            |
| GO:0051716   | cellular response to stimulus           | 213         | 1199         | 0.0                            |
| GO:0048870   | cell motility                           | 153         | 850          | 1.0E-4                         |
| GO:0065009   | regulation of molecular function        | 287         | 1774         | 1.0E-4                         |
| GO:0048522   | positive regulation of cellular process | 452         | 2775         | 1.0E-4                         |
